# Supplementary material for: Stratocumulus Cloud Clearings: Statistics from Satellites, Reanalysis Models, and Airborne Measurements
Source: Copernicus journal article supplement (doi:10.5194/acp-2019-1113), 2020-01-02
Supplement: Supplementary file 1 [file acp-2019-1113-supplement.pdf]

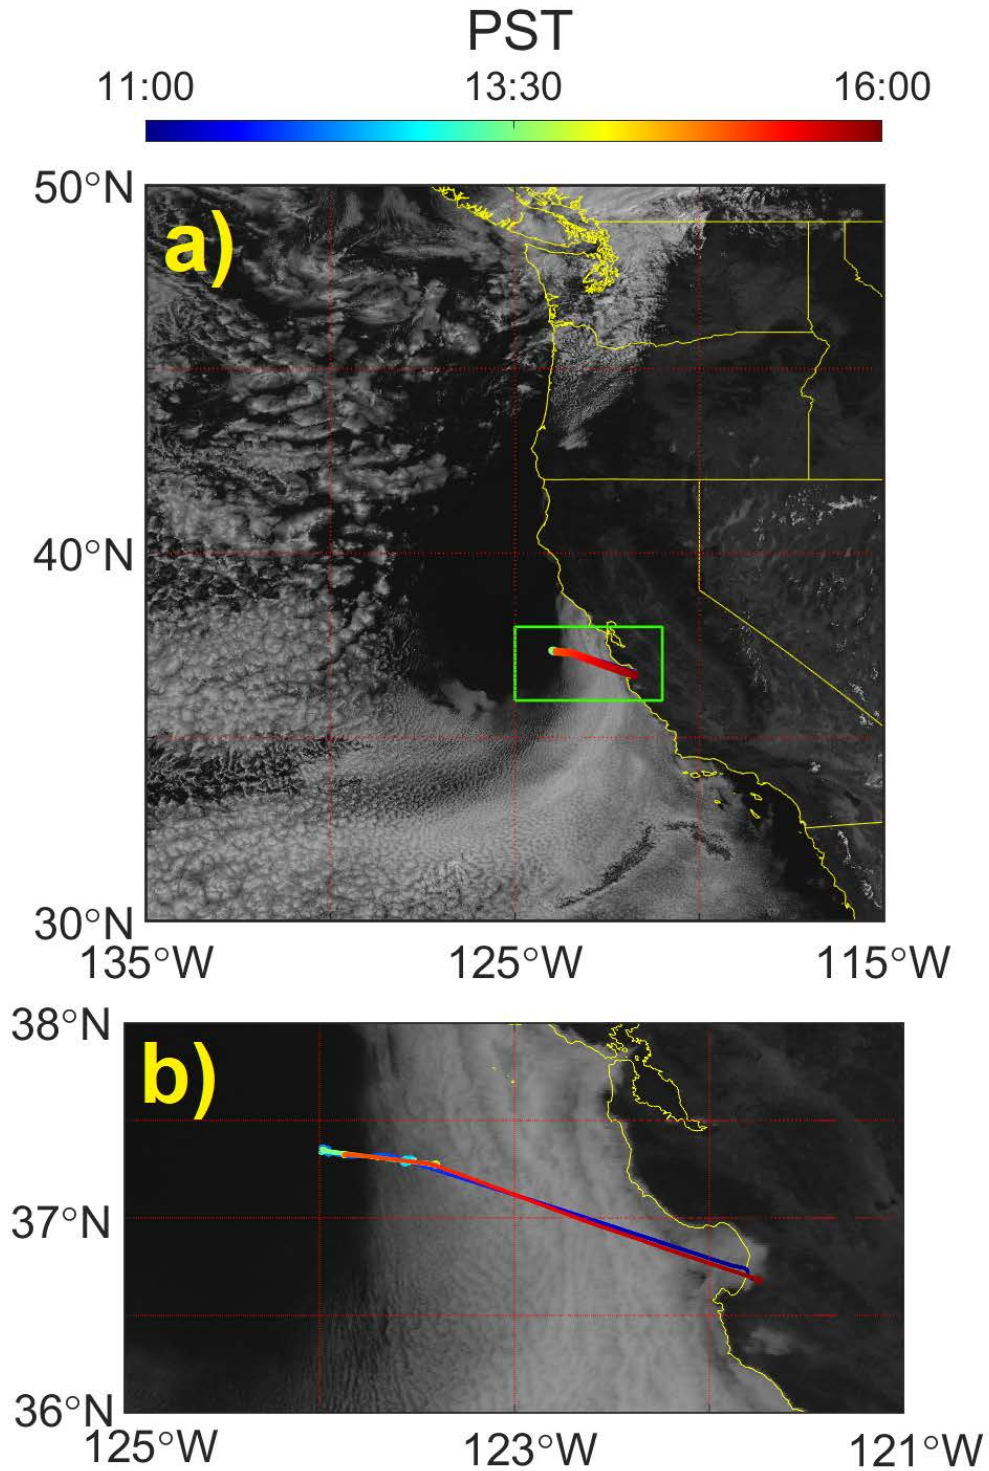

**Figure S1.** a) GOES 15 visible band image (11:45 PST (18:45 UTC) on 02 Aug 2016) with the overlaid flight path of FASE RF08. b) Zoomed in view of the satellite image to highlight the clear-cloudy border.

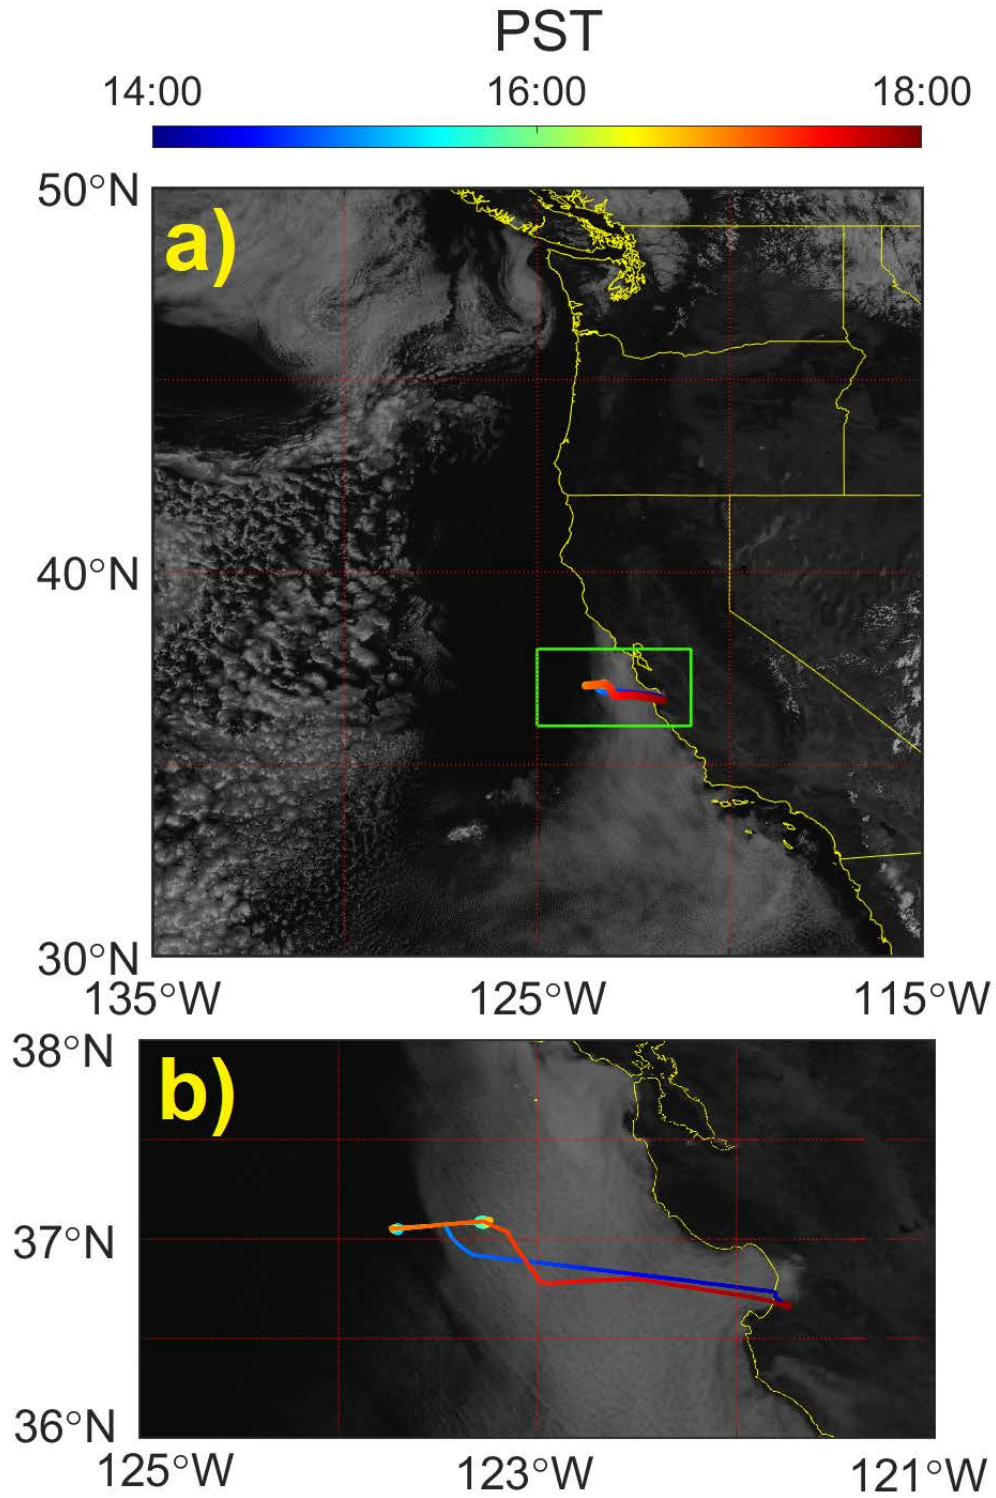

**Figure S2.** Same as Figure S1 except for FASE RF09B (image from 15:15 PST (22:15 UTC) on 03 Aug 2016).

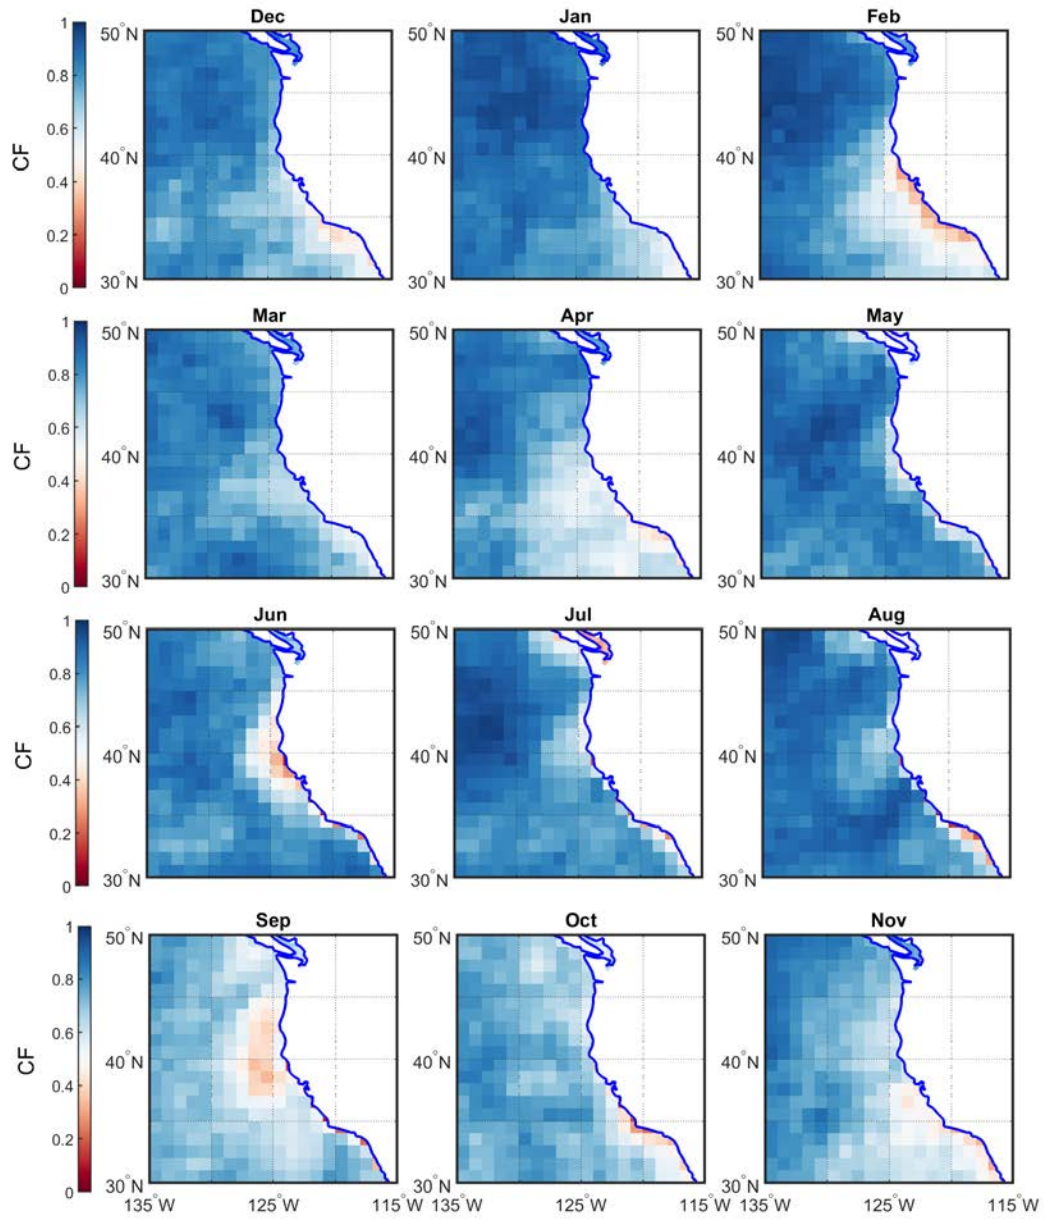

**Figure S3.** Average monthly cloud fraction (CF) for 2018 obtained from MODIS Terra Level 3 (Collection 6.1).

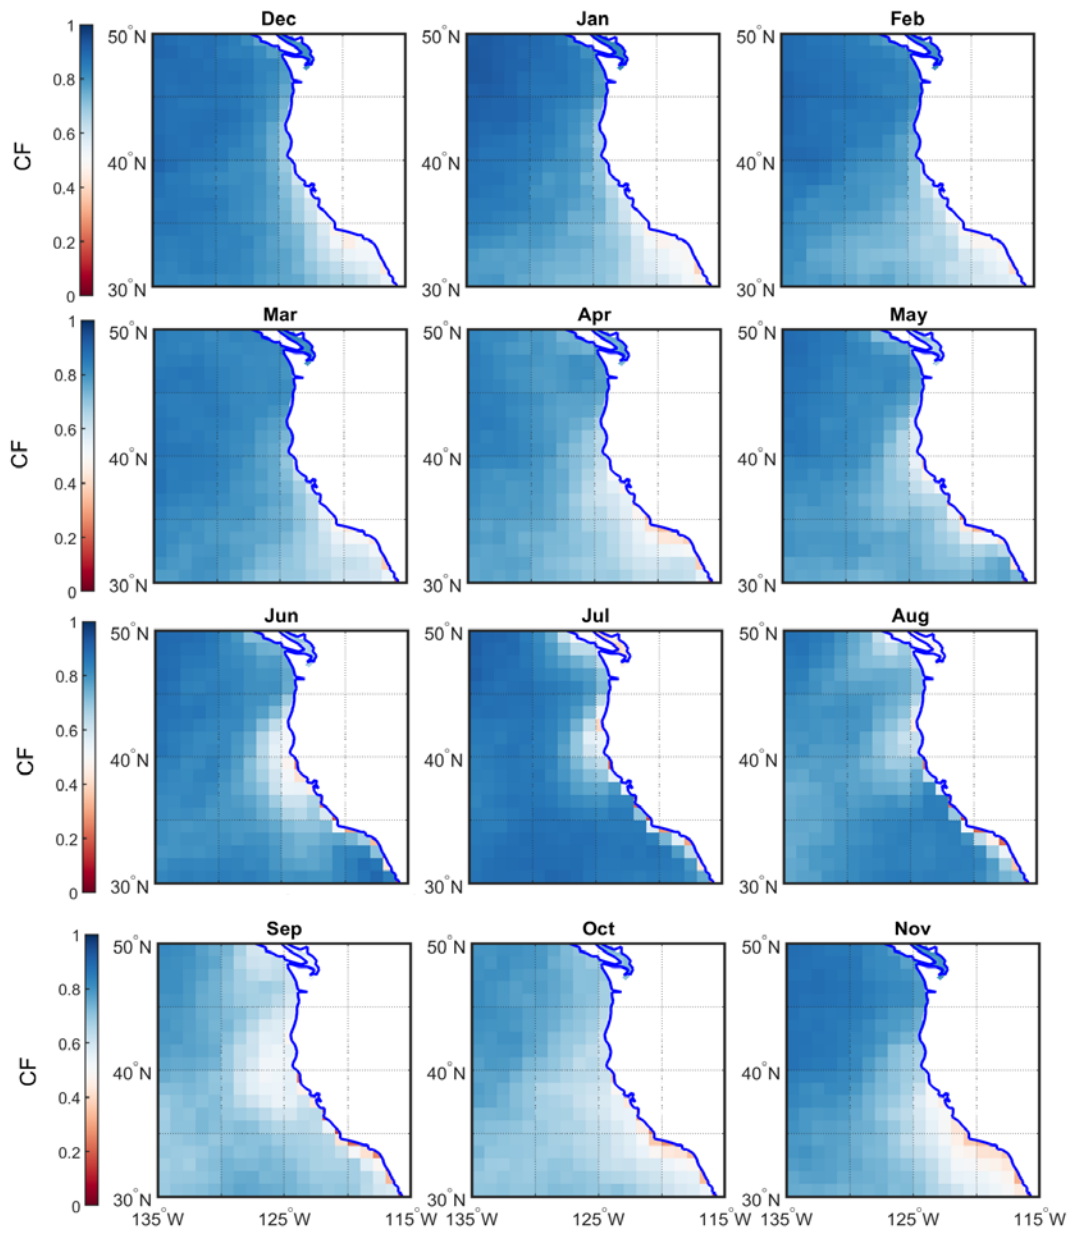

**Figure S4.** Average monthly cloud fraction (CF) for 2009 through 2018 obtained from MODIS Terra Level 3 (Collection 6.1).

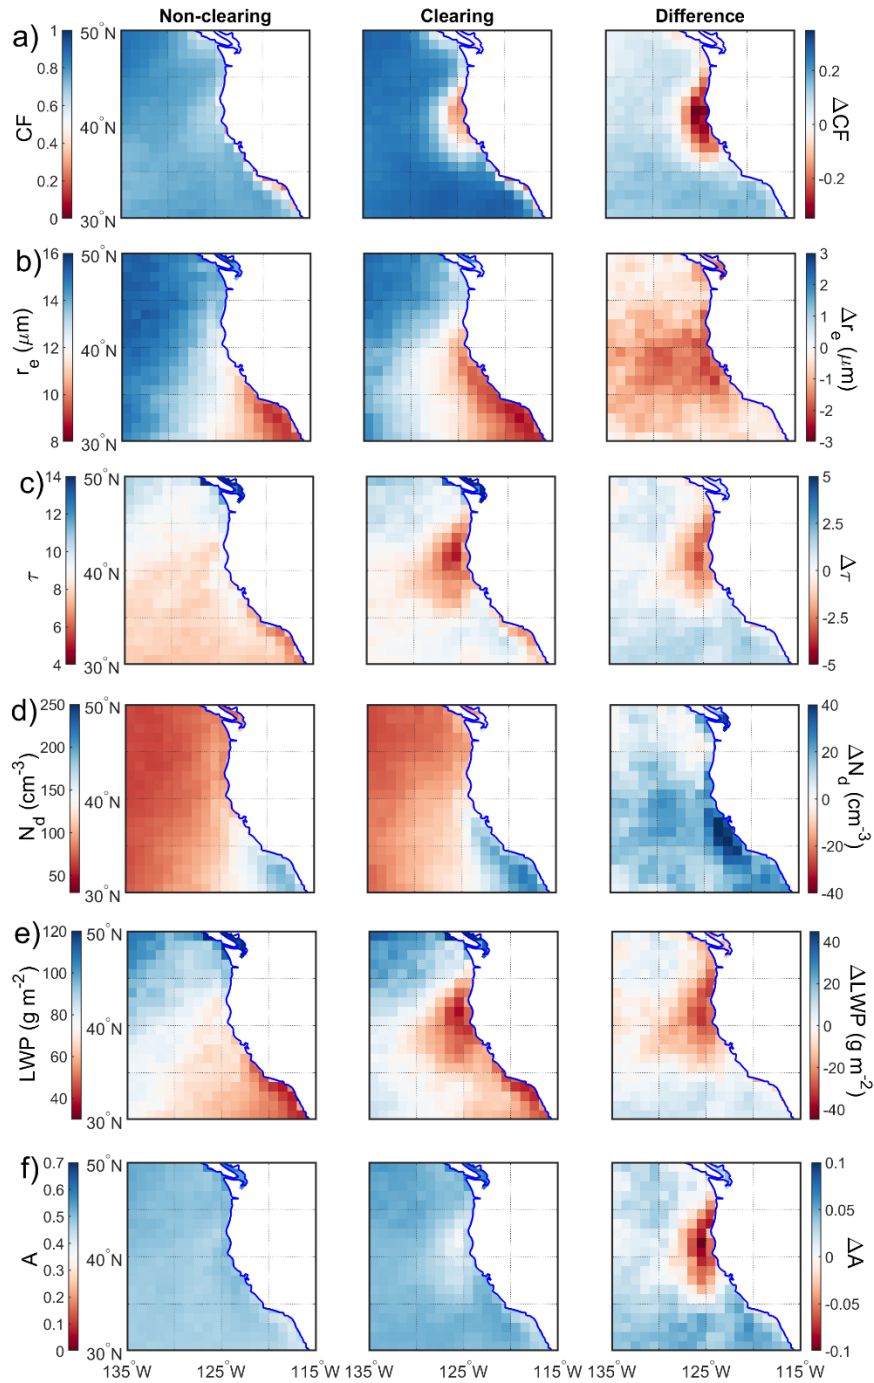

**Figure S5.** Average cloud parameters for non-clearing and clearing days obtained from MODIS Aqua Level 3 (Collection 6.1) data: a) cloud fraction day (CF), b) cloud top droplet effective radius ( $r_e$ ), c) cloud optical thickness ( $\tau$ ), d) cloud droplet number concentration ( $N_d$ ), e) cloud liquid water path (LWP), and f) cloud albedo (A). Differences (clearing minus non-clearing) are shown in the farthest right column with separate color scales. Values from any instances of clear pixels were omitted from the analysis to produce these figures.
